# Supplementary material for: Adiponectin preserves metabolic fitness during aging
Source: eLife. 2021 Apr 27;10:e65108. doi: 10.7554/eLife.65108 (PMC8099426; doi:10.7554/eLife.65108)
Supplement: Source data 1. [file elife-65108-data1.xls]

## Sheet: Figure1A
NCD-Survival curve
Lifespan(weeks)
WT	APN-KO
128	72.1429
76.7143	81.8571
79.5714	83.1429
80.4286	85.1429
85.8571	87
87.5714	88.1429
90.7143	88.1429
96.4286	88.4286
96.8571	88.4286
97.1429	92.8571
97.1429	98.4286
97.7143	98.5714
98.1429	98.8571
98.1429	99
98.7143	99
98.7143	99.5714
99.1429	100.857
100.286	101.429
100.571	101.571
101	107
105	107.143
109.286	107.714
148.429	108.143
110.286	108.286
110.429	108.286
110.857	108.286
112.286	108.429
113.143	109.286
113.714	109.857
113.714	110.429
113.857	111.286
114.714	111.286
114.714	111.429
115.286	113.286
116.429	113.286
116.714	114.286
117	114.714
117	115.286
118.429	116.143
118.429	116.286
118.714	116.857
120	117.143
120	117.143
120.571	117.286
120.571	118.143
120.714	119
120.714	119.143
120.714	119.286
120.714	119.571
120.714	120.143
121	120.143
121.571	121
122.571	121.429
122.857	121.571
123.143	122.857
123.286	124.286
124.429	125.429
124.429	128
128.429	129.143
128.429	130.857
129	131.714
129.143	132.714
129.143	132.857
130.429	133.286
130.857	133.714
131.286	133.857
132.429	141.571
133.714	144.714
134.857	147.429
137	150
139.857	155.429
140.571	59.5714
141.429
145.143
149.571
150
154.286
160
172.571
178.286
109.286

## Sheet: Figure1B
HFD-Survival curve
Lifespan(weeks)
WT	APN-KO
123.571	99.4286
111.429	99.4286
85.5714	67
67.1429	69
80.1429	71.1429
75.4286	83.2857
107.143	112.714
108.857	65.8571
122.286	118.571
159.286	79
67.1429	101.429
69.4286	82.4286
105	56.5714
118.143	82.5714
123.429	80.5714
43.8571	93.1429
55.8571	102.429
98.8571	102.714
122.429	103.857
135.857	63.7143
60.1429	63.8571
74.4286	91.8571
80.8571	111.571
121	111.857
125.571	111
23.1429	91.1429
94.8571	96.5714
94.8571	45.4286
118.714	74
133.429	79.4286
73.8571	98
117.571	81
132.143	86.8571
79.4286	87.7143
108.143	68.8571
114.714	14.5714
119.143	89.4286
120.571	90.5714
64.5714	93.7143
70.4286	46.5714
76.4286	63
81.8571	97.7143
104.714	97.8571
62.1429	89.1429
110	87.8571
87.5714	67.2857
57.7143	92.1429
110.429	63.5714
97.1429	46
112.286	46.8571
124.429	51.1429
124.429	98.8571
128.429	68.8571
71.1429	72.5714
120.286	80.4286
99	77.7143
99.2857	67
110.857	79.4286
76.7143	84.2857
85.8571	91.7143
90.7143
97.1429
122

## Sheet: Figure1-supplement1C
Adiponectin(ug/ml)
Mice/n	WT	APN-KO	Ctrl	dGly
1	30.3376	0.0483844	45.5611	48.941
2	27.6785	0.0483844	34.0746	50.568
3	25.5592	0.0953419	30.461	51.5436
4	34.9766	0.0483844	29.8441	53.778

## Sheet: Figure2A
NCD-Bodyweight/g
36weeks			50weeks			110weeks
40.76	34.13		46.4	39.09		36.28	25.26
38.12	29.19		41.28	44.38		29.63	35.72
35.9	31.22		40.53	36.89		36.89	31.31
37.75	29.08		47.41	38.59		41.25	32.2
35.42	30.08		39.33	32.79		42.78	33.49
32.21	32.2		47.22	45.16		40.83	30.89
31	31.21		49.62	36.29		29.77	24.2
33.99	24.93		53.17	39.58		23.41	33.38
37.94	30.95		56.36	31.94		40	37.63
32.7	30.66		52.44	34		38.69	32.73
39.61	34.4		30.73	38.4		36.23	28.29
31.56	32.93		29.3	43.15		35.53	33.55
30.55	36.38		26.85	33.63		25.84	33.14
33.27	35.03		35.34	47.14		30.24	27.3
34.3	29.49		35.46	53.94		30.46	25.76
29.08	28.52		40.59	44.15		34.92	35.62
29.5	37.21		41.58	33.98		31.21	35.1
27.31	28.9		40.39	30.31		40.7	30.83
28.73	27.36		27.59	32.87		55.12	37.28
30.7	33.85		30.56	37.23		34.28	34.82
29.11	39.64		32.21	36.62		44.18	24.76
35.87	28		37.55	31.28		42.79	29.36
36.8	35.47		45.16	36.49		31.9	29
30.64	33.85		40.22	38.13		37.47	30.62
31.75	33.38		48.96	38.92		40.05	28.88
25.19	30.76		42.87	30.71		27.2	36.31
28.9	28.23		50.22	32.87		35.64	29.61
26.16	29.22		38	26		34.13	31.58
30.6	30.06		47	41.22		40.75	36.3
28.1	33.1		44.04	39.73		44.32	37.03
28.35	31.27		44.22	40		43.57	32.55
30.24	33.1		44.13	37.33		28	29.07
31.52	35.9		54.08	39.12			38
30.15	31.21		61.7	37.7			43.31
30.36	29.58		47.3	34.38			34.22
33.05	31.98		31.13	40.2			33.98
32.59	32.77		48.08	51.97			33.09
27.32	29.11		36.36	40.83			36.49
29.48	31.7		56.2	61.69			30.75
31.53	31.95		49.06	46.53			34.15
29.06	27.79		39.28	54.73			33.16
27.49	33.95		30.48	48.6			32.62
28.38	30.96		48.17	26.41			37.89
27.59	29.66		33.22	41.59
26.38	31.78		32.58	31.41
29.78	30.89		34.46	46.88
38.23	26.3		29.85	38.58
31.55	30.8			50.53
34.26	35.19			37.72
36.72	31.7			41.36
33.4	30.36
25.19	29.9
35.94	28.48
28.11	31.92
32.33	27.98
28.83	28.66
26.46	37.62
29.66	34.75
31.18	34.4
33.03	32.56
34.12	32.89
30.12	33.73
36.34	28.26
24.89	32.5
29.01	32.28
28.95	35.65
24.6	22.66
25.74	27.61
23.66	27.8
23.97	28.13
31.08	29.32
30.21	30.6
27.56	30.3
32.38	27.84
29.58	30.91
26.81	27.91
28.63
27.7
26.54
27.83
30.13
28.16
29.66
29.33
29.64

## Sheet: Figure2B 
HFD-Bodyweight/g
36weeks			50weeks			110weeks
WT	APN-KO		WT	APN-KO		WT	APN-KO
51.24	43.51		61.49	67.88		41	38.5
54.51	52.79		77.26	54.88		54.14	67.4
48.69	44.43		56.33	66.45		54.7	58.35
52.29	47.95		71.06	61.16		60.75	60.22
31.38	49.2		72.71	41.09		64.42	54.21
53.4	56.21		47.83	55.56		56.2	45.32
54.81	52.35		61.92	58.12		69.54	48.1
43.16	53.79		66.24	27.6		68.75	58.22
56.16	61.09		61.72	72.03		68.47	59.22
52.02	54.45		63.89	76.76		56.98	69.66
58.9	30		54.58	59.15		51.49
48.1	51.2		41.57	70.98		40.89
53.7	56.23		60.05	39.06
49.55	58.8		76.47	79.25
56.22	53.39		46.9	72.86
43.23	50.52		35.7	78.89
45.78	55.6		62.06	68.82
53.17	53.25		64.65	75.96
47.46	55.08		60.38	60.89
48.22	50.55		62.9	68.69
52.74	38.04		70.77	60.22
51	50.42		70	47.05
47.88	51.5		60.09	62.61
42.31	48.23		73.38	60.49
40.16	51.45		86.86	62.89
38.66	48.24		78.06	51.38
60	51.09		63	61.68
48.72	52.1		58.85	63.18
50.15	43.2		57.09
47.78	52.09		43.49
49.56	53.5
45.23	52.82
52.07	56.57
47.77	51.87
49.92	55.79
49.3126

## Sheet: Figure2C
NCD-OGTT
	0 min	15 min	30min	60min	120min
WT	45	107	163	157	59
	60	74	102	74	58
	48	109	134	112	86
	58	161	165	114	89
	44	197	178	128	74
	59	245	189	97	74
	48	182	104	84	64
APN-KO	50	150	110	67	52
	76	167	147	120	94
	53	120	86	71	56
	70	126	90	108	72
	66	200	150	110	84
	67	233	184	137	102
	56	154	109	78	64

## Sheet: Figure2D
HFD-OGTT
	0 min	15 min	30min	60min	120min
WT	144.5	246	144.5	187	138
	131	233.5	184	174	133.5
	153.5	251	225	215.5	140
	144.5	225	179	183	148
	156	212.5	223	197	121
	117	154.5	78	97	108
	134.5	218.5	179	157	104.5
	151	200	144.5	155.5	110.5
APN-KO	137	233	202	159.5	122
	150.5	320.5	247	216	158
	196.667	319.5	333	252.5	157.5
	127	331.5	336.5	194.5	133
	172	287	232	203.5	143.5
	159	230	233.5	177	144
	127	234.5	200	131	117

## Sheet: Figure2E
NCD TG clearance
	0h	1h	2h	3h	4h	6h
WT	108.642	172.311	127.713	75.5589	82.4903	56.7625
	116.901	164.878	216.909	80.1798	66.3171	68.3147
	88.8207	162.4	192.132	50.1439	50.1439	45.9804
	117.727	241.685	318.493	70.938	77.8693	62.9237
	150.762	107.891	164.878	103.284	38.5917	32.8878
	83.8654	93.0253	184.699	100.974	89.4216	45.9804
	98.7314	174.788	169.833	128.699	61.6962	53.6818
	64.8699	112.847	83.1146	54.7649	40.9021	38.2788
	66.5217	110.369	75.6816	64.0066	47.8335	39.049
	0h	1h	2h	3h	4h	6h
APN-KO	83.0395	241.685	429.988	61.6962	64.0066	56.7625
	206.097	229.297	246.641	225.738	281.189	303.981
	84.6913	174.788	350.703	82.4903	73.2485	51.3714
	81.3877	184.699	209.476	94.0425	105.595	49.8311
	99.5573	132.668	306.105	114.837	73.2485	55.2221
	93.7761	132.668	224.342	66.3171	54.7649	66.0042
	96.2537	177.266	281.328	128.699	61.6962	49.8311
	18.6201	216.909	338.315	179.529	31.6604	25.1863
	130.115	286.284	429.988	195.702	84.8007	71.3953
	68.1735	177.266	187.177	77.8693	52.4544	45.2102

## Sheet: Figure2F
HFD TG clearance
Triglycerides(mg/dl)	0h	1h	2h	3h	4h	6h
WT	160.636	181.37	201.077	255.272	259.993	119.845
	123.684	198.613	173.979	149.345	102.335	58.9492
	88.3753	171.516	132.101	97.6133	76.9607	68.3838
	120.4	109.93	178.906	154.272	111.268	61.5222
	136.001	173.979	201.077	151.809	93.2568	80.3914
	75.237	105.004	117.321	117.321	53.803	41.7954
	119.579	208.467	188.76	203.54	167.018	72.6722
	149.961	183.833	186.296	176.443	87.2529	216.764
	0h	1h	2h	3h	4h	6h
APN-KO	117.115	151.809	218.321	292.224	186.912	112.984
	114.652	149.345	277.443	351.346	243.571	89.826
	117.936	210.931	316.858	218.321	94.1145	91.5414
	111.367	191.223	242.955	240.492	166.16	93.2568
	124.505	178.906	198.613	173.979	121.561	82.9645
	168.026	169.053	228.174	191.223	94.1145	85.5376
	123.684	127.174	159.199	100.077	109.553	91.5414
	108.904	107.467	262.662	144.418	85.5376	71.8145

## Sheet: Figure2G
NCD-Food intake/g
Time	WT									APN-KO
10:24	0.02	0.13	0.03	0.02	0.06	0.04	0.01	0.06		0.03	0.17	0.2	0.02	0.03	0.02	0.02
10:58	0.02	0.27	0.31	0.43	0.06	0.06	0.11	0.07		0.25	0.24	0.2	0.03	0.07	0.02	0.04
11:32	0.21	0.43	0.64	0.43	0.07	0.08	0.23	0.07		0.25	0.24	0.27	0.03	0.07	0.02	0.06
12:06	0.21	0.49	0.64	0.43	0.15	0.08	0.28	0.07		0.25	0.24	0.39	0.04	0.35	0.02	0.16
12:40	0.21	0.49	0.66	0.43	0.21	0.11	0.49	0.1		0.25	0.24	0.51	0.17	0.35	0.02	0.16
13:14	0.21	0.61	0.66	0.43	0.21	0.11	0.49	0.1		0.35	0.24	0.51	0.18	0.35	0.02	0.17
13:48	0.31	0.81	1.2	0.43	0.21	0.11	0.52	0.12		0.35	0.24	0.51	0.18	0.35	0.02	0.19
14:22	0.31	1.39	1.2	0.43	0.21	0.11	0.67	0.29		0.35	0.24	0.51	0.18	0.35	0.07	0.19
14:56	0.31	1.39	1.2	0.43	0.26	0.11	0.67	0.31		0.62	0.24	0.79	0.18	0.35	0.07	0.19
15:30	0.31	1.39	1.23	0.67	0.55	0.11	0.9	0.31		0.62	0.3	0.9	0.18	0.35	0.07	0.24
16:04	0.31	1.39	1.43	0.67	0.55	0.11	1.51	0.31		0.62	0.3	0.91	0.19	0.35	0.07	0.24
16:38	0.55	1.39	1.53	0.67	0.55	0.11	1.51	0.48		0.67	0.3	0.91	0.2	0.35	0.39	0.24
17:12	1.15	1.5	1.54	0.67	0.55	0.11	1.52	0.57		0.75	0.39	0.91	0.34	0.35	0.45	0.52
17:46	1.15	1.51	1.56	0.9	0.55	0.11	1.59	0.57		0.75	0.39	0.91	0.47	0.35	0.46	0.52
18:20	1.15	1.51	1.81	0.9	0.62	0.11	1.72	0.74		1.11	0.45	0.91	0.54	0.35	0.46	0.73
18:54	1.15	1.69	1.93	0.9	0.78	0.15	1.73	0.88		1.41	0.58	1.11	0.62	0.35	0.59	1.01
19:28	1.15	1.79	2.18	1.16	0.8	0.15	1.91	1.03		1.57	0.62	1.41	0.83	0.79	1.1	1.05
20:02	1.42	1.82	2.26	1.23	1.09	0.32	2.1	1.11		1.89	1	1.41	0.85	0.79	1.1	1.16
20:36	1.77	2.1	2.73	1.63	1.3	0.38	2.28	1.13		2.2	1.16	1.41	1.13	1.17	1.41	1.44
21:10	1.77	2.17	2.87	1.99	1.35	0.6	2.5	1.13		2.2	1.34	1.55	1.34	1.21	1.57	1.52
21:44	1.77	2.72	3.05	2.42	1.55	0.8	2.7	1.15		2.2	1.48	1.79	1.54	1.25	1.76	1.91
22:18	1.77	2.72	3.58	2.61	1.98	0.95	2.73	1.22		2.2	1.72	2.1	1.84	1.8	1.83	2.23
22:52	2.09	2.72	3.58	2.65	2.16	1.15	2.86	1.22		2.72	1.84	2.56	2.11	2.16	2.42	2.6
23:26	2.23	2.72	3.81	2.65	2.36	1.68	3.05	1.39		2.72	2.08	2.97	2.33	2.4	2.42	2.6
0:00	2.23	3.37	3.81	2.65	2.42	1.68	3.2	1.74		2.72	2.2	3.14	2.68	2.4	3.34	2.96
0:34	2.38	3.37	3.81	2.81	2.42	1.68	3.2	2.06		2.86	2.38	3.15	2.82	2.4	3.34	2.96
1:08	2.46	3.37	3.81	3.22	2.42	1.81	3.28	2.15		3.03	2.59	3.15	2.94	2.4	3.34	3.31
1:42	2.93	3.62	3.81	3.59	2.42	1.99	3.57	2.42		3.03	2.86	3.15	2.94	2.5	3.56	3.31
2:16	3.02	3.66	4.06	3.59	2.42	1.99	3.71	2.57		3.03	2.86	3.15	2.94	2.76	3.56	3.65
2:50	3.02	3.66	4.06	3.59	2.42	2.2	3.71	2.57		3.03	2.86	3.18	3.5	2.76	3.78	3.66
3:24	3.02	3.66	4.15	3.59	2.56	2.2	3.81	2.57		3.03	3.21	3.41	4.06	2.9	3.78	4.06
3:58	3.31	4.04	4.33	3.59	2.77	2.52	3.99	2.57		3.11	3.21	3.75	4.07	3.36	3.78	4.06
4:32	3.34	4.6	4.33	3.59	2.93	2.78	3.99	2.58		3.69	3.3	3.85	4.07	3.36	4.09	4.06
5:06	3.34	4.84	4.47	3.59	2.93	2.78	4.27	2.59		3.69	3.66	4.02	4.14	3.51	4.09	4.07
5:40	3.34	4.84	4.76	3.87	2.93	2.78	4.27	2.59		3.7	4.01	4.18	4.15	3.54	4.09	4.09
6:14	3.34	4.92	4.8	3.87	3.05	3.33	4.41	2.59		4.23	4.04	4.18	4.15	3.54	4.14	4.36
6:48	3.34	4.92	4.8	3.87	3.3	3.63	4.67	2.6		4.47	4.26	4.18	4.21	3.64	4.14	4.36
7:22	3.93	4.92	4.91	3.87	3.35	3.63	4.72	2.64		4.47	4.26	4.18	4.21	3.69	4.2	4.36
7:56	3.93	4.92	4.91	3.87	3.35	3.63	4.97	2.64		4.47	4.26	4.18	4.35	3.69	4.2	4.36
8:30	3.93	4.92	4.91	3.87	3.35	3.63	5.06	2.64		4.51	4.26	4.18	4.35	3.98	4.2	4.36
9:04	3.93	4.92	4.91	3.87	3.35	3.63	5.17	2.64		4.51	4.58	4.18	4.53	4.4	4.25	4.36
9:38	3.93	4.92	4.91	3.87	3.57	3.74	5.17	2.64		4.51	4.58	4.18	4.53	4.4	4.35	4.36
10:12	3.93	4.92	5.02	3.87	3.57	3.75	5.17	2.64		4.51	4.58	4.18	4.53	4.4	4.35	4.36
10:46	3.93	4.92	5.02	3.87	3.57	3.76	5.27	2.64		4.7	4.58	4.18	4.62	4.4	4.35	4.36
11:20	3.93	4.92	5.02	4.04	3.57	3.83	5.34	2.66		4.73	4.58	4.18	4.62	4.4	4.35	4.36
11:54	3.93	4.92	5.02	4.04	3.57	3.83	5.74	2.66		4.73	4.58	4.18	4.63	4.4	4.35	4.36
12:28	3.93	4.92	5.18	4.04	3.57	3.9	5.77	2.66		4.73	4.58	4.18	4.86	4.4	4.35	4.36
13:02	4.25	4.92	5.18	4.04	3.57	3.9	5.77	2.66		4.73	4.58	4.18	4.91	4.4	4.35	4.36
13:36	4.25	4.92	5.39	4.34	3.7	3.9	5.93	2.71		4.73	4.58	4.18	4.91	4.4	4.35	4.36
14:10	4.25	4.94	5.75	4.34	3.87	3.94	5.93	2.71		4.73	4.58	4.33	5.22	4.4	4.35	4.36
14:44	4.25	5.08	5.75	4.34	3.87	3.98	6.08	2.76		4.73	4.58	4.61	5.22	4.4	4.35	4.61
15:18	4.25	5.12	6.16	4.34	3.87	3.98	6.08	2.77		4.73	4.58	5.04	5.22	5.03	4.44	4.61
15:52	4.56	5.12	6.17	4.35	3.87	3.98	6.51	2.8		4.95	4.86	5.25	5.22	5.03	4.45	4.83
16:26	4.56	5.12	6.17	4.97	3.98	4.06	6.51	2.98		5.17	4.86	5.25	5.22	5.03	4.69	4.83
17:00	4.56	5.16	6.18	4.97	4.23	4.06	6.51	2.98		5.17	4.86	5.25	5.26	5.03	4.69	4.84
17:34	4.79	5.3	6.55	4.97	4.23	4.07	6.61	2.98		5.23	4.86	5.25	5.48	5.03	4.69	5.05
18:08	5.16	5.44	6.63	4.97	4.23	4.22	6.61	3.27		5.46	5	5.25	5.48	5.03	4.73	5.2
18:42	5.16	5.67	6.63	5.3	4.61	4.22	6.77	3.27		5.46	5	5.35	5.54	5.03	5.12	5.21
19:16	5.16	5.82	6.9	5.3	4.83	4.39	6.97	3.3		5.8	5.28	5.79	5.69	5.03	5.27	5.33
19:50	5.42	5.82	7.04	5.54	4.83	4.51	6.97	3.55		6.21	5.39	5.9	5.82	5.16	5.27	5.65
20:24	5.69	6.05	7.71	5.96	5.05	4.77	7.4	3.63		6.42	5.7	5.9	5.97	5.43	5.89	5.95
20:58	5.69	6.49	7.71	6.52	5.25	4.89	7.64	3.86		6.57	5.94	6.1	6.13	5.46	6.11	5.95
21:32	5.69	6.49	7.78	6.77	5.33	5.09	7.64	3.87		6.72	6.2	6.53	6.34	5.76	6.11	6.39
22:06	5.69	6.49	8.04	7.35	5.69	5.32	7.74	4.09		6.72	6.2	7.06	6.53	6.03	6.57	6.39
22:40	6.19	6.89	8.07	7.35	5.97	5.49	7.95	4.1		6.72	6.63	7.58	6.87	6.08	6.57	6.73
23:14	6.63	6.89	8.6	7.35	6.1	5.84	7.95	4.6		6.73	6.71	7.91	7.03	6.36	7.09	6.73
23:48	6.63	6.89	8.6	7.35	6.1	5.84	8.12	4.81		7.23	6.97	8.4	7.2	6.36	7.09	7.02
0:22	6.63	6.89	8.71	7.35	6.1	5.97	8.2	5.01		7.23	6.97	8.4	7.82	6.36	7.37	7.03
0:56	6.78	6.89	8.71	7.78	6.1	6.25	8.2	5.03		7.23	7.19	8.4	7.84	6.36	7.62	7.53
1:30	6.78	6.89	8.82	7.78	6.1	6.25	8.23	5.41		7.35	7.19	8.4	7.84	6.47	7.65	7.53
2:04	7.08	6.89	9.12	7.78	6.42	6.25	8.52	5.42		7.76	7.51	8.4	7.99	6.66	8.34	7.92
2:38	7.35	6.89	9.12	7.78	6.72	6.69	8.67	5.5		7.76	7.51	8.4	8.1	7.78	8.34	7.93
3:12	7.35	7.13	9.12	7.78	6.72	6.83	8.69	5.5		7.76	7.51	8.42	8.15	7.78	8.34	7.94
3:46	7.35	7.13	9.27	7.78	6.72	6.83	8.8	5.68		7.76	7.9	9.08	8.21	7.78	8.34	8.11
4:20	7.88	7.13	9.89	7.78	6.72	7.26	8.91	5.75		7.76	7.99	9.71	8.3	7.78	8.34	8.34
4:54	7.88	7.13	9.89	7.79	6.72	7.29	9.02	5.79		8.09	8	10.02	8.34	7.78	8.34	8.34
5:28	7.99	7.13	10.07	8.04	6.72	7.5	9.15	5.96		8.09	8.29	10.02	8.57	8.02	8.46	8.34
6:02	8.15	7.13	10.26	8.26	7.01	7.77	9.21	5.99		8.54	8.69	10.02	8.57	8.37	8.81	8.35
6:36	8.15	7.13	10.26	8.26	7.23	7.8	9.54	5.99		8.65	8.7	10.02	8.57	8.37	8.81	8.65
7:10	8.15	7.13	10.26	8.26	7.38	8.01	9.69	6.03		8.73	9.18	10.02	8.57	8.37	8.81	8.65
7:44	8.15	7.13	10.51	8.26	7.45	8.01	9.69	6.27		8.73	9.18	10.02	8.6	8.37	8.81	8.65
8:18	8.18	7.13	10.51	8.26	7.45	8.01	9.79	6.27		8.74	9.18	10.02	8.8	8.38	8.81	8.65
8:52	8.28	7.17	10.51	8.26	7.45	8.05	9.88	6.27		8.74	9.18	10.02	8.81	8.38	8.94	8.89
9:26	8.29	7.17	10.51	8.29	7.47	8.18	9.89	6.56		8.74	9.32	10.02	8.88	8.4	8.94	8.89
10:00	8.29	7.17	10.51	8.29	7.47	8.25	9.93	6.56		8.77	9.48	10.02	8.88	8.44	8.94	8.89
10:34	8.44	7.17	10.51	8.29	7.5	8.25	10.06	6.89		8.77	9.48	10.02	9.08	8.44	8.97	8.89
11:08	8.45	7.17	10.51	8.29	7.77	8.51	10.21	7.07		8.77	9.48	10.23	9.08	8.44	8.97	9.16
11:42	8.82	7.17	10.68	8.29	7.77	8.51	10.29	7.21		8.92	9.48	10.23	9.08	8.44	8.97	9.16
12:16	8.83	7.17	10.68	8.29	7.77	8.51	10.45	7.25		8.92	9.48	10.23	9.08	8.44	8.97	9.16
12:50	8.83	7.17	11.04	8.52	7.77	8.51	10.5	7.25		8.93	9.48	10.23	9.08	8.44	8.97	9.16
13:24	8.83	7.63	11.05	8.52	7.77	8.51	10.51	7.25		8.94	9.48	10.23	9.25	8.44	8.97	9.16
13:58	8.84	7.63	11.05	8.52	7.77	8.51	10.67	7.25		8.94	9.48	10.23	9.25	8.44	9.27	9.16
14:32	9.31	7.63	11.05	8.76	7.8	8.51	10.85	7.25		8.99	9.48	10.23	9.25	8.44	9.27	9.16
15:06	9.31	7.63	11.05	8.76	7.84	8.52	11.27	7.25		8.99	9.48	10.45	9.25	8.51	9.27	9.16
15:40	9.39	7.63	11.43	8.82	8.27	8.56	11.27	7.25		9.14	9.81	10.45	9.25	8.51	9.27	9.16
16:14	9.4	7.63	11.68	8.99	8.27	8.61	11.28	7.25		9.14	9.81	10.45	9.34	8.51	9.27	9.16
16:48	9.4	7.76	11.72	8.99	8.27	8.61	11.33	7.39		9.14	9.81	10.45	9.34	8.51	9.27	9.52
17:22	9.4	7.93	11.99	9.17	8.27	8.61	11.56	7.57		9.22	9.81	10.47	9.48	8.69	9.37	9.65
17:56	9.4	8.15	11.99	9.69	8.27	8.93	11.73	7.57		9.56	10.33	10.47	9.55	8.77	9.54	9.65
18:30	10.49	8.33	11.99	9.7	8.82	8.93	11.87	7.57		9.56	10.33	10.47	9.65	8.77	9.81	9.65
19:04	10.49	8.33	12.17	9.7	8.87	8.93	11.97	7.8		9.57	10.33	10.47	9.9	8.77	10.12	9.92
19:38	10.49	8.4	12.27	9.81	9.12	9.1	12.17	7.8		9.97	10.38	10.47	10.05	8.97	10.12	9.92
20:12	10.49	8.48	12.66	10.27	9.58	9.34	12.41	8.03		10.3	10.85	10.51	10.23	9.33	10.53	10.19
20:46	10.49	8.78	12.85	10.8	9.63	9.55	12.61	8.27		10.7	11.1	10.88	10.32	9.35	10.53	10.36
21:20	10.49	8.79	13.07	11.32	10.08	9.98	12.76	8.67		10.7	11.12	11.41	10.61	9.86	11.02	10.69
21:54	10.49	8.87	13.49	11.32	10.36	10.25	12.96	8.81		10.7	11.45	11.78	10.61	9.89	11.02	10.7
22:28	11	8.91	13.49	11.44	10.36	10.51	13.07	8.83		11.09	11.6	12.06	10.82	9.94	11.3	10.71
23:02	11	9	13.49	12.09	10.36	10.8	13.25	9.16		11.09	11.87	12.28	11.09	10.1	11.46	11.02
23:36	11.11	9.05	13.82	12.1	10.36	10.8	13.31	9.16		11.09	12.1	12.38	11.15	10.28	11.86	11.27
0:10	11.44	9.05	14.19	12.1	10.36	11.06	13.41	9.27		11.55	12.1	12.38	11.61	10.41	11.94	11.27
0:44	11.44	9.05	14.19	12.12	10.36	11.06	13.49	9.46		11.55	12.38	12.38	11.61	10.41	11.94	11.57
1:18	11.44	9.06	14.19	12.13	10.36	11.27	13.58	9.98		12.12	12.38	12.4	11.66	10.41	12.4	11.87
1:52	11.44	9.08	14.19	12.13	10.73	11.83	13.7	10.35		12.12	12.52	12.49	11.85	10.62	12.64	11.87
2:26	11.76	9.08	14.4	12.13	11.06	11.83	13.86	10.62		12.12	12.78	12.91	11.85	10.73	12.64	11.92
3:00	11.91	9.08	14.5	12.14	11.06	11.83	13.98	10.71		12.13	12.78	13.55	12.11	10.78	12.94	12.23
3:34	11.91	9.75	14.5	12.14	11.06	11.87	14.01	11.1		12.13	12.94	13.55	12.11	11.17	12.94	12.23
4:08	12	10.22	14.5	12.35	11.43	12.12	14.07	11.1		12.14	12.95	13.55	12.24	11.76	12.94	12.27
4:42	12	10.22	14.91	12.8	11.43	12.12	14.27	11.23		12.15	13.43	13.81	12.42	11.91	13.18	12.31
5:16	12.37	10.23	15.15	13	11.43	12.3	14.3	11.23		12.17	13.65	14.21	12.58	11.91	13.18	12.31
5:50	12.59	10.24	15.53	13	11.43	12.3	14.47	11.29		12.45	13.8	14.38	12.58	11.91	13.55	12.65
6:24	12.61	10.55	15.53	13	11.56	12.41	14.59	11.29		12.92	13.99	14.62	12.58	11.96	13.55	12.65
6:58	12.64	10.65	15.53	13.03	11.58	12.81	14.69	11.29		12.92	14.24	14.62	12.59	11.96	13.55	12.65
7:32	12.76	10.65	15.63	13.03	11.58	12.81	14.83	11.29		12.92	14.24	14.62	12.59	11.96	13.55	12.65
8:06	12.76	10.65	15.68	13.04	11.58	12.81	14.94	11.29		12.93	14.24	14.62	12.64	11.96	13.55	12.65
8:40	13.22	10.65	15.68	13.05	11.58	12.81	15.07	11.29		12.93	14.24	14.62	12.69	11.96	13.84	12.65
9:14	13.42	10.65	15.68	13.08	11.58	12.88	15.09	11.29		12.93	14.53	14.62	12.69	11.96	13.84	12.65
9:48	13.42	10.65	15.87	13.08	11.58	12.88	15.17	11.29		12.93	14.53	14.62	12.69	11.96	13.84	12.65
10:22	13.42	10.65	15.89	13.09	11.58	12.88	15.24	11.29		13.53	14.53	14.62	12.84	11.96	13.85	12.65
10:56	13.42	10.65	15.89	13.11	11.98	13.17	15.39	11.29		13.53	14.53	14.64	12.84	11.96	13.85	12.65
11:30	13.42	10.65	15.89	13.11	11.98	13.17	15.51	11.29		13.53	14.53	15.17	12.92	11.96	13.85	12.65
12:04	13.42	10.65	16.62	13.11	11.98	13.17	15.54	11.29		13.53	14.77	15.38	12.92	11.96	13.86	12.67
12:38	13.42	10.65	16.62	13.15	11.98	13.17	15.55	11.29		13.53	14.77	15.38	12.92	11.96	13.88	12.67
13:12	13.42	10.73	16.62	13.4	11.98	13.17	15.69	11.29		13.65	14.77	15.38	12.92	11.96	14	12.67
13:46	13.42	10.82	16.62	13.4	11.98	13.36	15.72	11.29		13.65	14.77	15.38	13.09	11.96	14.04	12.67
14:20	13.42	11.14	16.84	13.4	11.98	13.36	15.85	11.29		13.66	14.77	15.38	13.2	11.96	14.04	12.67
14:54	13.42	11.19	16.84	13.56	11.98	13.36	15.94	11.29		13.66	14.77	15.38	13.2	11.96	14.04	13.01
15:28	13.51	11.19	16.84	13.7	11.98	13.37	16.02	11.29		13.67	14.77	15.38	13.49	12.2	14.04	13.01
16:02	13.8	11.19	16.84	13.83	11.98	13.37	16.2	11.35		13.67	14.77	15.74	13.55	12.2	14.05	13.13
16:36	13.8	11.33	16.84	13.83	11.98	13.38	16.31	11.43		13.91	14.85	16.24	13.91	12.2	14.24	13.14
17:10	13.91	11.5	16.84	14.21	11.98	13.56	16.34	11.55		13.91	14.96	16.24	13.91	12.2	14.24	13.18
17:44	14.08	11.52	17.11	14.34	12	13.56	16.49	11.55		13.91	14.96	16.24	13.91	12.32	14.25	13.57
18:18	14.09	11.52	17.14	14.34	12.07	13.56	16.62	11.57		13.99	14.99	16.24	13.91	12.32	14.56	13.57
18:52	14.14	11.68	17.33	14.34	12.27	13.66	16.98	11.92		14.31	15.22	16.24	14.04	12.35	14.8	13.58
19:26	14.14	11.84	17.44	15.49	12.28	13.69	17.08	12.18		14.39	15.4	16.24	14.08	12.73	15.17	14.04
20:00	14.55	11.9	17.87	15.52	12.37	14.09	17.46	12.27		14.75	15.65	16.51	14.39	13.01	15.18	14.05
20:34	15.01	12.17	17.88	15.52	12.41	14.19	17.5	12.5		14.84	15.82	16.74	14.58	13.02	15.51	14.25
21:08	15.01	12.25	18.5	15.52	12.42	14.29	17.56	12.8		15.24	16.09	16.74	14.79	13.29	15.67	14.61
21:42	15.01	12.45	18.5	15.67	12.42	14.59	17.63	12.9		15.24	16.12	17.09	15.02	13.3	15.67	14.61
22:16	15.01	12.6	18.76	15.93	12.42	14.78	17.7	13.21		15.24	16.59	17.52	15.08	13.82	16.12	14.76
22:50	15.09	12.62	19.37	15.93	12.49	15.02	17.75	13.59		15.37	16.59	17.85	15.08	14.12	16.24	14.78
23:24	15.19	12.72	19.37	15.93	12.49	15.17	17.79	13.77		15.37	17.04	18.26	15.34	14.12	16.24	15.09
23:58	15.19	12.81	19.37	15.93	12.49	15.19	17.84	13.79		15.41	17.04	18.33	15.35	14.18	16.7	15.37
0:32	15.2	12.81	19.37	15.93	12.49	15.6	17.84	14.16		15.57	17.13	18.33	15.54	14.35	16.7	15.38
1:06	15.64	12.93	19.37	15.93	12.49	15.77	17.84	14.26		15.82	17.14	18.33	15.74	14.63	17.04	15.46
1:40	15.69	13.07	19.38	15.93	12.49	15.9	17.84	14.47		15.82	17.74	18.33	15.74	14.71	17.04	15.9
2:14	15.69	13.15	20.04	16	12.49	16.07	17.84	14.93		15.82	17.74	18.6	15.97	14.77	17.34	15.9
2:48	15.69	13.33	20.04	16.3	12.49	16.07	17.84	14.93		15.82	17.74	19.19	16.21	14.88	17.44	16.04
3:22	15.69	13.36	20.04	16.3	12.49	16.37	17.84	15.46		15.82	17.9	19.21	16.39	14.88	17.73	16.05
3:56	16.03	13.52	20.04	16.3	12.49	16.64	17.85	15.8		15.82	17.93	19.21	16.4	15	17.73	16.29
4:30	16.27	13.87	20.04	16.3	12.49	16.7	17.87	15.81		16.21	18.19	19.58	16.52	15.51	17.9	16.29
5:04	16.27	13.87	20.58	16.43	12.49	16.9	17.87	16.01		16.21	18.19	20.04	16.52	15.51	17.9	16.29
5:38	16.57	13.87	20.58	16.46	12.49	17.29	17.87	16.4		16.37	18.46	20.06	16.79	15.57	17.9	16.65
6:12	17.41	13.92	20.73	16.46	12.49	17.51	17.87	16.4		16.84	18.74	20.06	16.83	16.05	17.91	16.66
6:46	17.41	13.95	20.75	16.46	12.49	17.56	17.96	16.4		16.84	18.81	20.06	16.83	16.11	17.91	16.67
7:20	17.41	13.95	20.75	16.46	12.49	17.56	18.09	16.4		16.86	18.81	20.07	16.89	16.11	17.91	16.89
7:54	17.41	13.95	20.75	16.46	12.49	17.56	18.2	16.85		16.86	18.81	20.07	16.89	16.11	17.91	16.9
8:28	17.41	13.95	20.75	16.46	12.49	17.61	18.28	16.85		17.05	18.81	20.07	16.97	16.11	17.94	16.9

[truncated: 28 more sheets: Figure2H , Figure2-figure supplement1A, Figure2-figure supplement1B, Figure2-figure supplement1C, Figure2-figure supplement1E, Figure4A, Figure4B, Figure4C, Figure4D, Figure4E, Figure4G, Figure4H, Figure4-figure supplement1A, Figure4-figure supplement1B, Figure4-figure supplement1C, Figure5A, Figure5B, Figure5C, Figure5D, Figure5E …]
