# Supplementary material for: Adiponectin preserves metabolic fitness during aging
Source: eLife journal article supplement (doi:10.7554/elife.65108), 2021-04-27

Figure 1-figure supplement 1

A

|          | Chow diet |         | HFD     |         | Chow diet |              |
|----------|-----------|---------|---------|---------|-----------|--------------|
| Genotype | WT        | APN-KO  | WT      | APN-KO  | Ctrl      | $\Delta$ Gly |
| Cohort   | 81 male   | 72 male | 63 male | 60 male | 45 male   | 37 male      |

B

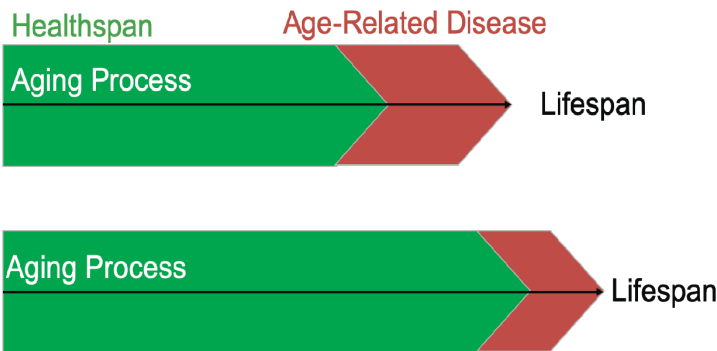

C

Serum Adiponectin Concentration

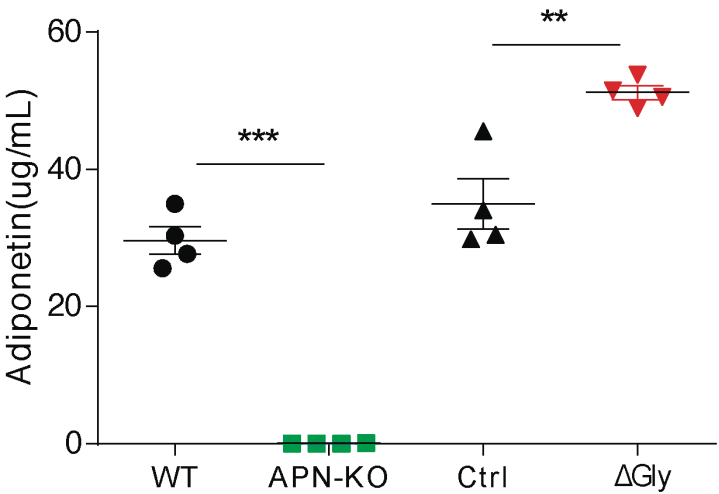

Supplement: supp [file elife-65108-supp-v1.zip]
