# Supplementary figures and images for: Adiponectin preserves metabolic fitness during aging
Source: eLife journal article supplement (doi:10.7554/elife.65108), 2021-04-27

# Figure 4-figure supplement1

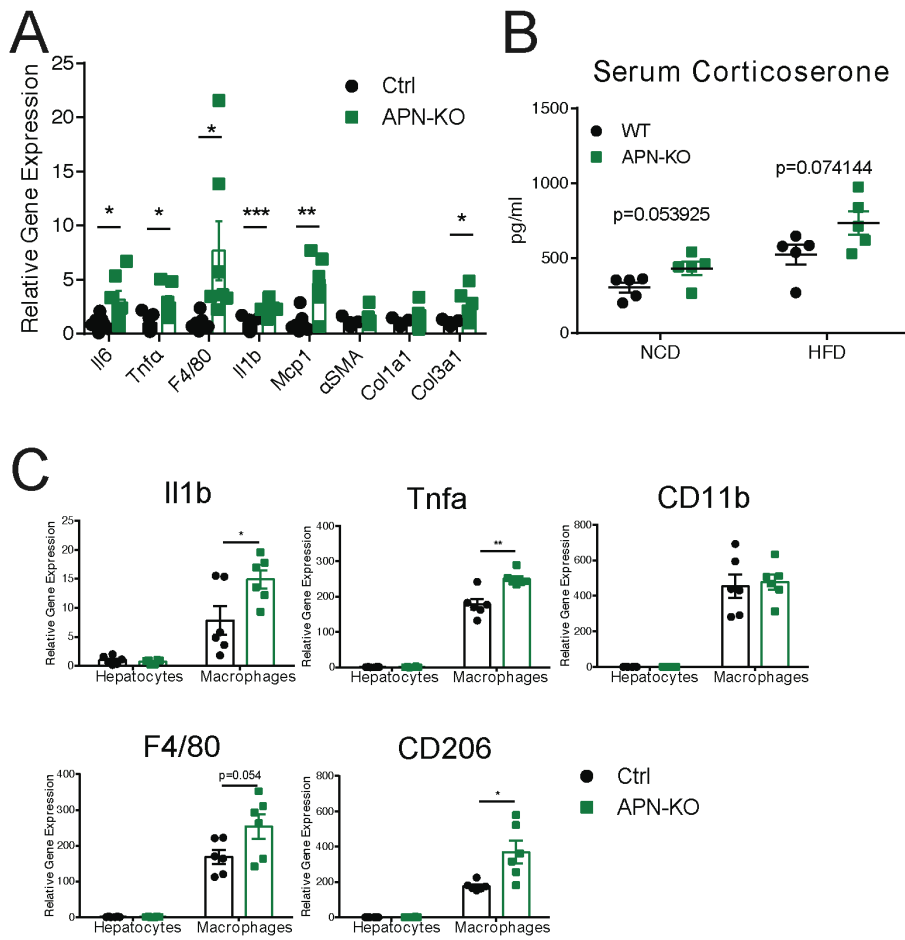

Supplement: supp [file elife-65108-supp-v1.zip]

# Figure 2-figure supplement 1

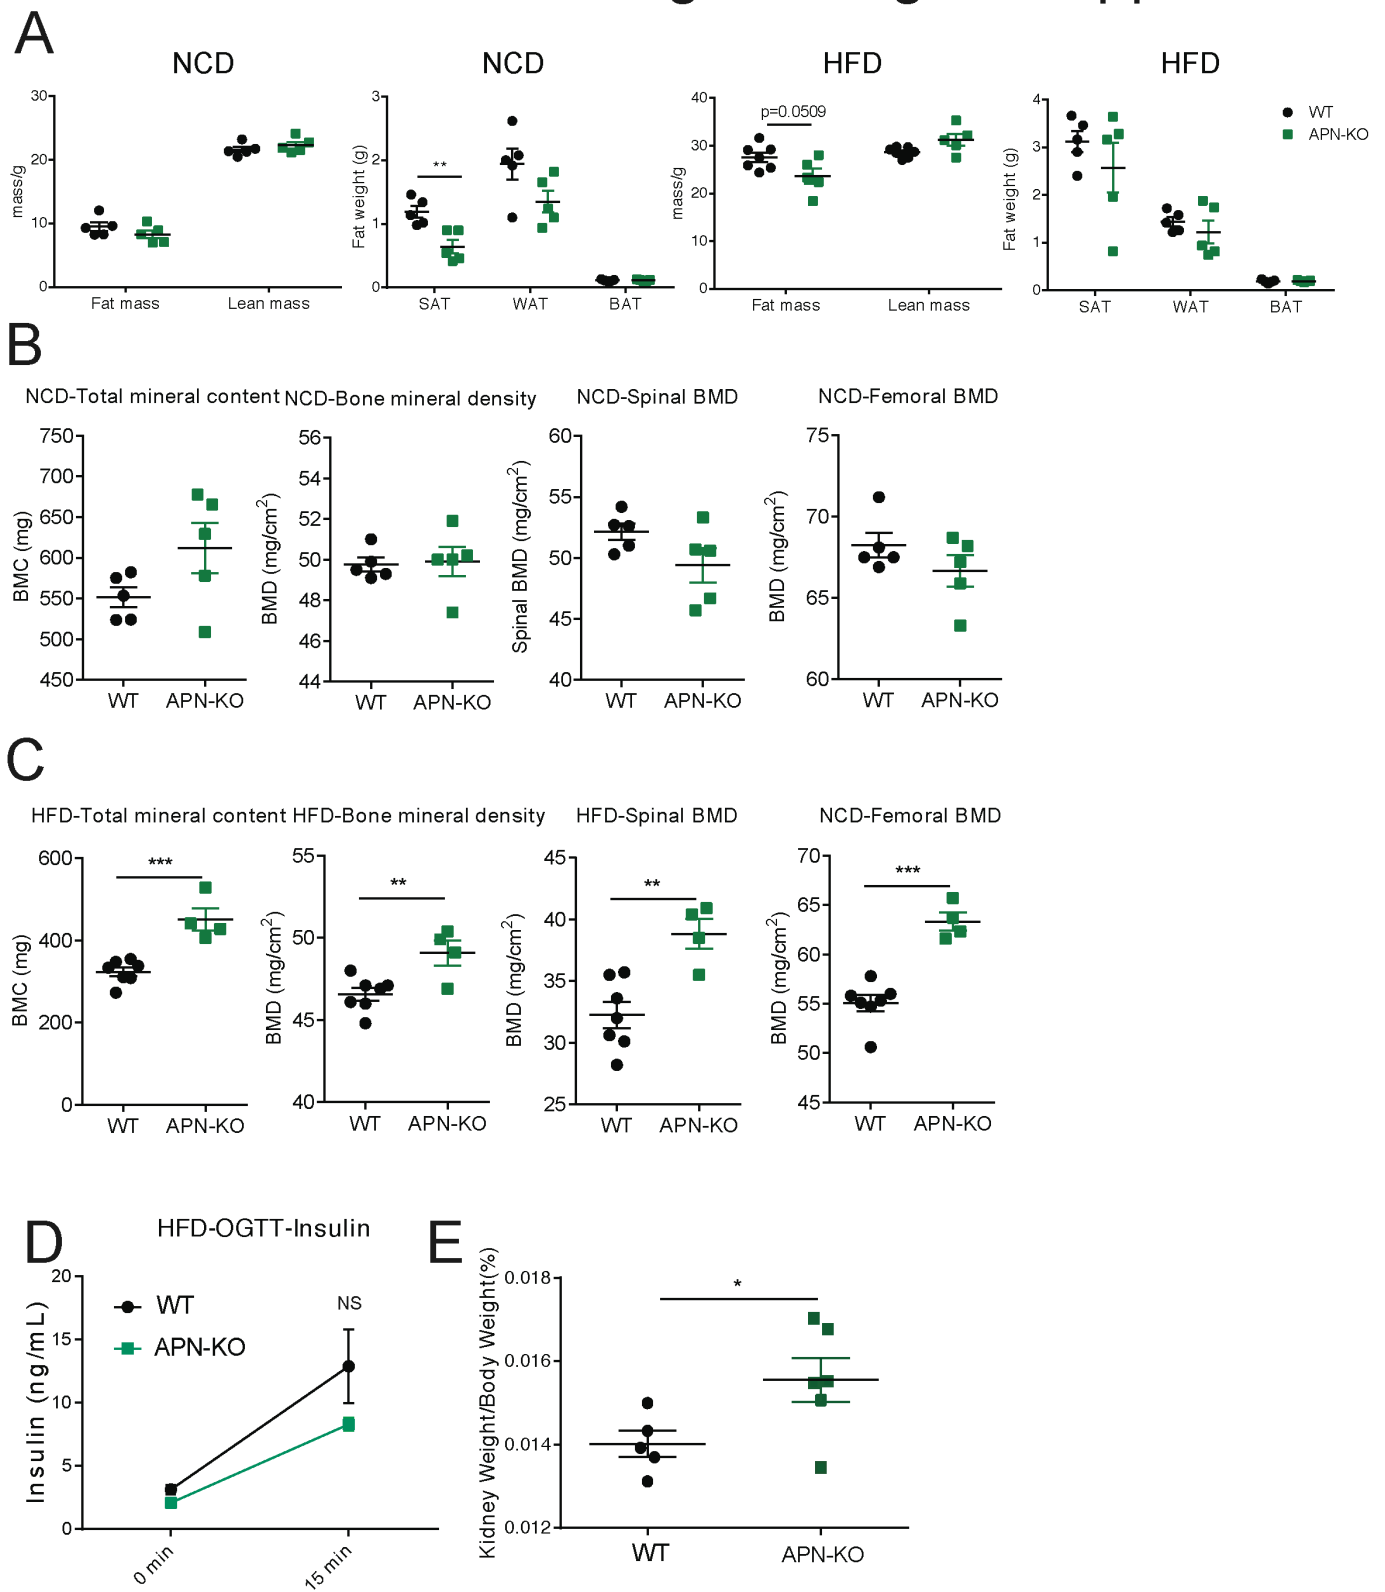

Supplement: supp [file elife-65108-supp-v1.zip]
